# Supplementary material for: Incidence of Augmentation in Primary Restless Legs Syndrome Patients May Not Be That High: Evidence From A Systematic Review and Meta-Analysis
Source: PubMed Central journal article supplement (PMC4718292; doi:10.1097/md.0000000000002504), 2016-01-15

Figure that illustrate the control of hypertension in Myanmar

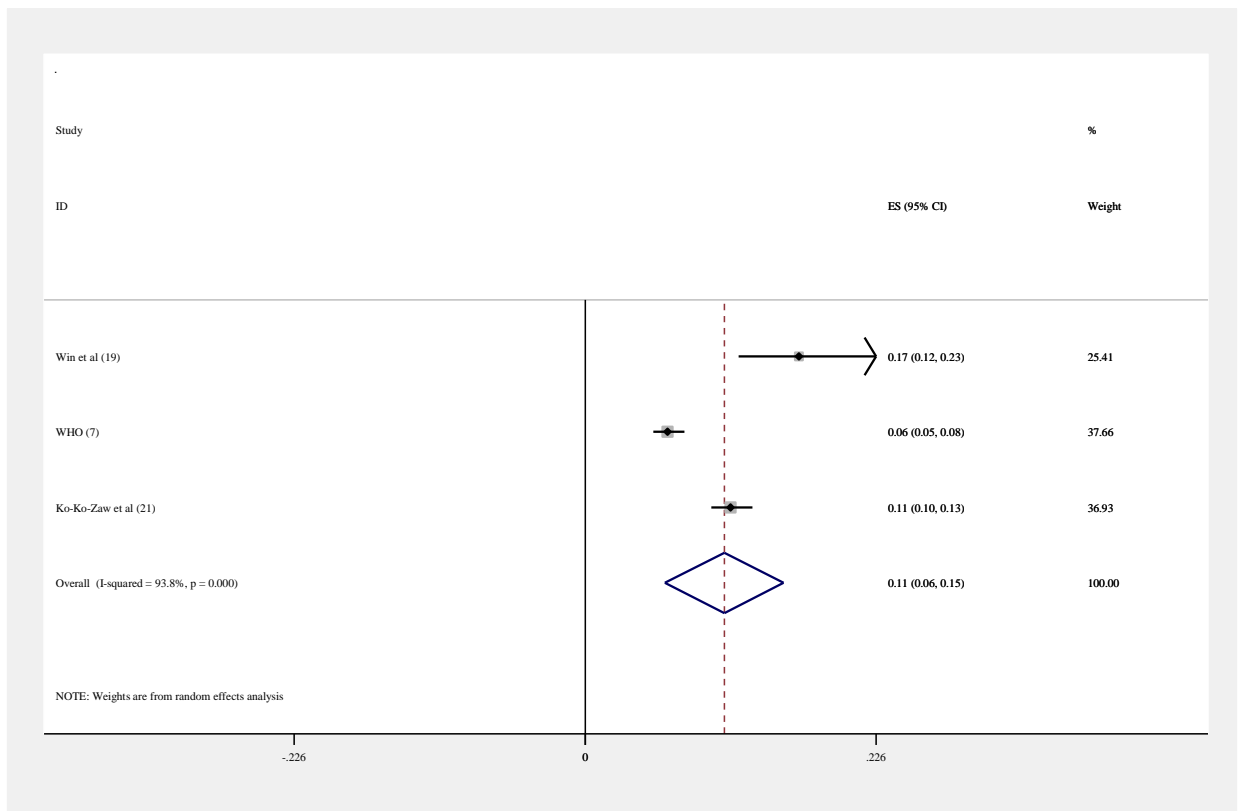

Supplement: medi-95-e2504-s002.pdf [file medi-95-e2504-s002.pdf]
